# Supplementary material
Source: PubMed Central journal article supplement (PMC3754309)
Supplement: AAC.00523-13_zac009132148so1.pdf [file AAC.00523-13_zac009132148so1.pdf]

**TABLE S1** Bacterial strains, plasmids, and primers used in this study.

|                             | Description                                                                                                                                                         | Reference             |
|-----------------------------|---------------------------------------------------------------------------------------------------------------------------------------------------------------------|-----------------------|
| <i>Streptomyces</i> strains |                                                                                                                                                                     |                       |
| <i>S. coelicolor</i> M600   | SCP1 <sup>-</sup> SCP2 <sup>-</sup>                                                                                                                                 | Kieser et al. 2000    |
| <i>S. coelicolor</i> H2004  | $\Delta$ <i>ddlA</i> (SCO5560):: <i>apr</i> , SCP1 <sup>-</sup> SCP2 <sup>-</sup>                                                                                   | Novotna et al. 2012   |
| <i>S. coelicolor</i> H2009  | H2004 + pGN8                                                                                                                                                        | This study            |
| <i>S. coelicolor</i> H2012  | H2004 + pGN17                                                                                                                                                       | This study            |
| <i>S. coelicolor</i> H2027  | H2004 + pJ10257                                                                                                                                                     | This study            |
| <i>S. coelicolor</i> H2077  | M600 + pJ10257                                                                                                                                                      | Novotna et al. 2012   |
| <i>S. coelicolor</i> H360   | H2009 + pMK2                                                                                                                                                        | This study            |
| <i>S. coelicolor</i> H361   | H2012 + pMK2                                                                                                                                                        | This study            |
| <i>S. coelicolor</i> J2175  | $\Delta$ <i>vanRS</i> :: <i>apr</i> , SCP1 <sup>-</sup> SCP2 <sup>-</sup>                                                                                           | Hutchings et al. 2006 |
| <i>S. coelicolor</i> J3130  | $\Delta$ <i>femX</i> :: <i>apr</i> , SCP1 <sup>-</sup> SCP2 <sup>-</sup>                                                                                            | Hong et al. 2005      |
| <i>E. coli</i> strains      |                                                                                                                                                                     |                       |
| ET12567 (pUZ8002)           | ET12567 containing helper plasmid pUZ8002                                                                                                                           | Paget et al. 1999     |
| BW25113 (pIJ790)            | BW25113 containing helper plasmid pIJ790                                                                                                                            | Gust et al. 2003      |
| Plasmids                    |                                                                                                                                                                     |                       |
| pJ773                       | pBluescript KS(+) containing the apramycin resistance gene and <i>oriT</i> of Plasmid RP4, flanked by FRT sites (Ampicillin <sup>R</sup> )(Apramycin <sup>R</sup> ) | Gust et al. 2003      |
| pIJ790                      | Modified $\lambda$ RED recombination plasmid pKD20 (Chloramphenicol <sup>R</sup> )                                                                                  | Gust et al. 2003      |
| pIJ6902                     | integrative ( $\phi$ C31 <i>attP-int</i> ) and conjugative ( <i>oriT</i> RK2), <i>tipAp</i> expression vector (Apramycin <sup>R</sup> )(Thiostrepton <sup>R</sup> ) | Huang et al. 2005     |
| pJ10257                     | integrative ( $\phi$ BT1 <i>attP-int</i> ) and conjugative ( <i>oriT</i> RK2), <i>ermEp</i> expression vector (Hygromycin <sup>R</sup> )                            | Hong et al. 2005      |
| pSET152                     | $\phi$ C31 <i>attP-int</i> derived integration vector for the conjugal transfer of DNA from <i>E. coli</i> to <i>Streptomyces</i> spp. (Apramycin <sup>R</sup> )    | Bierman et al. 1992   |
| pUZ8002                     | Non-transmissible <i>oriT</i> -mobilising plasmid (Kanamycin <sup>R</sup> )                                                                                         | Keiser et al. 2000    |
| pHJH5                       | <i>ddlA</i> gene cloned into pGEM T-easy vector (Ampicillin <sup>R</sup> )                                                                                          | This study            |
| pGN8                        | <i>ddlA</i> gene cloned into pJ10257 under <i>ermEp</i> control (Hygromycin <sup>R</sup> )                                                                          | This study            |
| pGN15                       | <i>vanA</i> gene cloned into pGEM T-easy vector (Ampicillin <sup>R</sup> )                                                                                          | This study            |
| pGN17                       | <i>vanA</i> gene cloned into pJ10257 under <i>ermEp</i> control (Hygromycin <sup>R</sup> )                                                                          | This study            |
| pHJH4                       | derivative of pSET152 containing <i>vanJp-neo</i> (Apramycin <sup>R</sup> )                                                                                         | This study            |
| pMK1                        | derivative of pSET152 containing <i>tsr</i> (Apramycin <sup>R</sup> )(Thiostrepton <sup>R</sup> )                                                                   | This study            |
| pMK2                        | derivative of pSET152 containig <i>tsr</i> and <i>vanJp-neo</i> (Apramycin <sup>R</sup> )(Thiostrepton <sup>R</sup> )                                               | This study            |
| Primers                     |                                                                                                                                                                     |                       |
| <i>ddlA</i> KO F            | TCTCGAGGCACCGCGGGCGGGTACTCTCAACGCGATATGATTCCGGGGATCCGTCGACC                                                                                                         |                       |
| <i>ddlA</i> KO R            | GGGAGTCGCCTTCTCTGTGGTCACGACACGAAAGCGTCATGTAGGCTGGAGCTGCTTC                                                                                                          |                       |
| <i>ddlA</i> KO Test F       | TGAAGGAAGTGTATGTCGCGCA                                                                                                                                              |                       |
| <i>ddlA</i> KO Test R       | TTCCCGGACCAGACAGGAAAC                                                                                                                                               |                       |
| <i>ndel-dlIA</i> F          | CCGGCATATGATGAGCACCGAGAACCTCCCCCAGA                                                                                                                                 |                       |
| <i>pacI-dlIA</i> R          | CCGGTTAATTAATCAGCGCAGTCCGGTGGGCCGCC                                                                                                                                 |                       |
| <i>ndel-vanA</i> F1         | CCGGCATATGATGGCTGAGTCGGACAAGTTGGCCA                                                                                                                                 |                       |
| <i>bln-vanA</i> R           | CCGGCCTAGGTCATCGGAGCTTCCCCGTCAACGCC                                                                                                                                 |                       |
| <i>qvanH</i> F              | ACGAGAATCACGGTTTACGG                                                                                                                                                |                       |
| <i>qvanH</i> R              | CTTGTGGTCAATGCTGATGC                                                                                                                                                |                       |
| <i>qvanK</i> F              | CCGCAGTTCAAGTACGAGGT                                                                                                                                                |                       |
| <i>qvanK</i> R              | GGACGTAGAGGTCGTGGAAC                                                                                                                                                |                       |
| <i>vanH</i> S1 FOR          | TTCGACCTCTATATGAAGCGACGT                                                                                                                                            |                       |
| <i>vanH</i> S1 REV          | TGAGAGTCGCCTCGACGCCGAAA                                                                                                                                             |                       |
| G1680                       | CACCGACCGGCAGGTGCGCG                                                                                                                                                |                       |
| G1681                       | TCGAGCACCTCGCCCATGTC                                                                                                                                                |                       |

## References

1. **Kieser T, Bibb MJ, Buttner MJ, Chater KF, Hopwood DA.** 2000. Practical *Streptomyces* Genetics, The John Innes Foundation, Norwich, UK.
2. **Novotna G, Hill C, Vicent K, Liu C, Hong H-J.** 2012. A novel membrane protein, VanJ, conferring resistance to teicoplanin. *Antimicrob. Agents Chemother.* **56**:1784-1796.
3. **Hutchings MI, Hong H-J, Buttner MJ.** 2006. The vancomycin resistance VanRS signal transduction system of *Streptomyces coelicolor*. *Mol. Microbiol.* **59**:923-935.
4. **Hong H-J, Hutchings MI, Hill L, Buttner MJ.** 2005. The role of the novel Fem protein VanK in vancomycin resistance in *Streptomyces coelicolor*. *J. Biol. Chem.* **280**:13055-13061.
5. **Paget MSB, Chamberlin L, Atrih A, Foster SJ, Buttner MJ.** 1999. Evidence that the extracytoplasmic function sigma factor,  $\sigma^E$ , is required for normal cell wall structure in *Streptomyces coelicolor* A3(2). *J. Bacteriol.* **181**:204-211.
6. **Gust B, Challis GL, Fowler K, Kieser T, Chater KF.** 2003. PCR-targeted *Streptomyces* gene replacement identifies a protein domain needed for biosynthesis of the sesquiterpene soil odor geosmin. *Proc. Natl. Acad. Sci. U. S. A.* **18**:1541-1546.
7. **Huang J, Shi J, Molle V, Sohlberg B, Weaver D, Bibb MJ, Karoonuthaisiri N, Lih CJ, Kao CM, Buttner MJ, Cohen SN.** 2005. Cross-regulation among disparate antibiotic biosynthetic pathways of *Streptomyces coelicolor*. *Mol. Microbiol.* **58**:1276-1287.
8. **Bierman M, Logan R, O'Brien K, Seno ET, Nagaraja Rao R, Schonher BE.** 1992. Plasmid cloning vectors for the conjugal transfer of DNA from *Escherichia coli* to *Streptomyces* spp. *Gene* **116**:43-49.

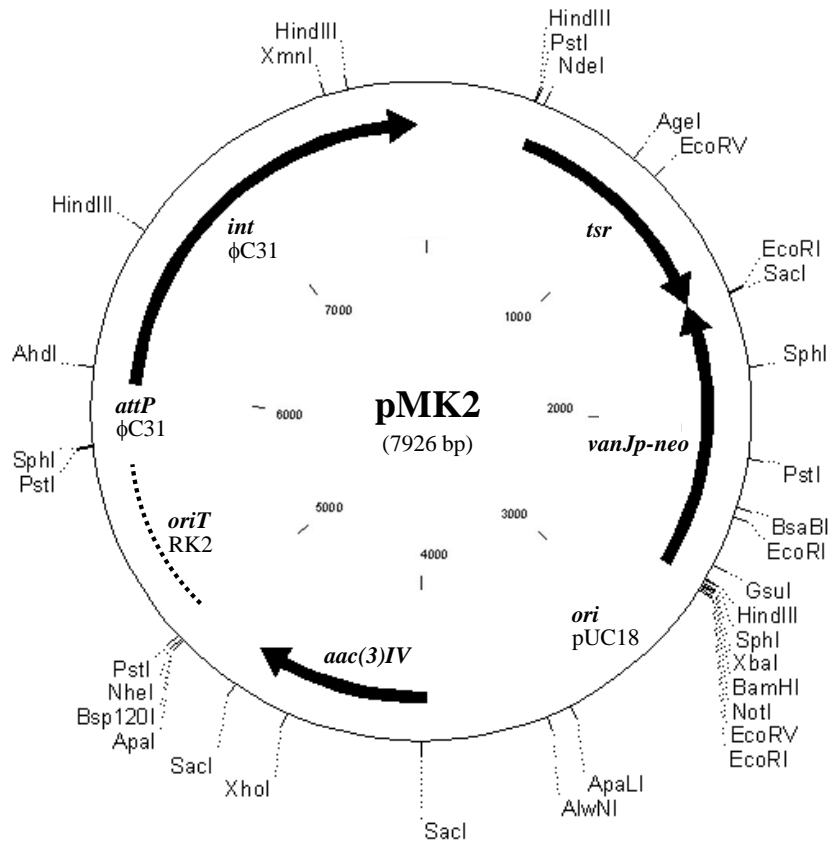

**FIG S1** Integrative reporter plasmid pMK2 carrying the *neo*, neomycin/kanamycin resistance gene, expressed under the control of the vancomycin inducible *vanJ* promoter (*vanJp*). *aac(3)IV*, apramycin resistance gene; *tsr*, thiostrepton resistance gene; *oriT* RK2 for conjugation; *attP* and *int* for integration at the  $\phi$ C31 phage attachment site.

| construct                                           | D-lac<br>(10 mM) | Vancomycin (mg/L) |        |        |        |        |        |        |        |        |
|-----------------------------------------------------|------------------|-------------------|--------|--------|--------|--------|--------|--------|--------|--------|
|                                                     |                  | 0                 | 0.0075 | 0.0150 | 0.0300 | 0.0600 | 0.1250 | 0.2500 | 0.5000 | 1.0000 |
| wild type<br>(H2077)                                | -                |                   |        |        |        |        |        |        |        |        |
|                                                     | +                |                   |        |        |        |        |        |        |        |        |
| $\Delta$ <i>ddlA</i><br>(H102)                      | -                |                   |        |        |        |        |        |        |        |        |
|                                                     | +                |                   |        |        |        |        |        |        |        |        |
| $\Delta$ <i>ddlA</i> + <i>ermEp-ddlA</i><br>(H2009) | -                |                   |        |        |        |        |        |        |        |        |
|                                                     | +                |                   |        |        |        |        |        |        |        |        |
| $\Delta$ <i>ddlA</i> + <i>ermEp-vanA</i><br>(H2012) | -                |                   |        |        |        |        |        |        |        |        |
|                                                     | +                |                   |        |        |        |        |        |        |        |        |

**FIG S2** D-Lac supplementation alters the ratio of D-Ala-D-Ala:D-Ala-D-Lac-containing PG precursors in strains expressing the VanA ligase, and increases the concentration of vancomycin required for survival of the vancomycin-dependent  $\Delta$ *ddlA* mutant strain. Phenotypic analysis of *S. coelicolor* wild type (H2077),  $\Delta$ *ddlA* (H2027) and  $\Delta$ *ddlA* complemented by the ligases encoded by *ddlA* (H2009) or *vanA* (H2012) expressed from the constitutive *ermEp*. Approximately  $10^5$  spores of each strain were spotted onto MMCGT plates containing different concentrations of vancomycin in the presence or absence of 10 mM D-Lac, as indicated. The result was scored after 4 days incubation at 30°C. Both complemented strains H2009 and H2012 grow in the absence of vancomycin and are unaffected by supplementation of the media with 10 mM D-Lac. This contrasts with  $\Delta$ *ddlA* carrying only the empty pIJ10257 vector (H2027) which requires at least 0.25 mg/ml vancomycin for detectable growth in the presence of the D-Lac supplement, and 0.06 mg/ml in its absence. M600 harbouring pIJ10257 (H2077) is shown as a control.
